# Supplementary material for: Strain-level genetic diversity of Methylophaga nitratireducenticrescens confers plasticity to denitrification capacity in a methylotrophic marine denitrifying biofilm
Source: PubMed Central journal article supplement (PMC5918138; doi:10.7717/peerj.4679), 2018-04-23
Supplement: peerj-06-4679-s004.pdf [file peerj-06-4679-s004.pdf]

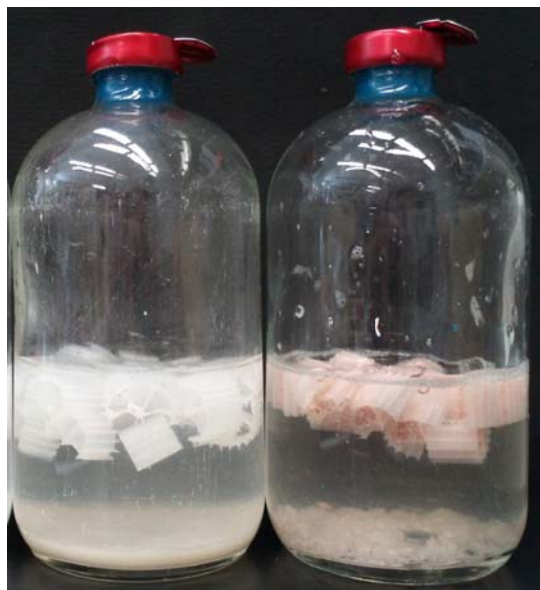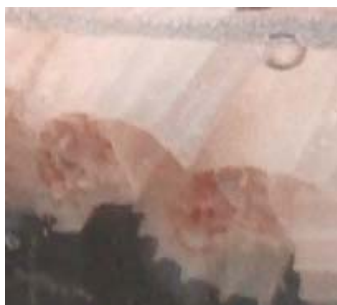

Figure S2: Biofilm batch culture on the Bioflow carriers

-Left vial: The dispersed biofilm before the first transfer.

-Right vial: Biofilm culture after the 5th transfer.

The biofilm is light pink and attached to the carriers.
