# Supplementary material for: Strain-level genetic diversity of Methylophaga nitratireducenticrescens confers plasticity to denitrification capacity in a methylotrophic marine denitrifying biofilm
Source: PeerJ. 2018 Apr 23;6:e4679. doi: 10.7717/peerj.4679 (PMC5918138; doi:10.7717/peerj.4679)
Supplement: Supplemental Information 1 [file peerj-06-4679-s001.xlsx]

## Sheet: Figure 1
Time (h)	NO3-			NO2-			NOx			mM
	Rep1	Rep2	Rep3	Rep1	Rep2	Rep3	Rep1	Rep2	Rep3
0	23.47	23.68	23.99	0	0	0	23.47	23.68	23.99
2	11.85	13.8	14.33	5.88	6.02	5.81	17.73	19.82	20.14
4	4.53	5.9	6.28	9.61	10.08	10.05	14.14	15.98	16.33
6	1.18	0.43	0.9	10.35	8.47	10.95	11.52	8.9	11.85
8	0	0	0	4.54	7.23	8.04	4.54	7.23	8.04
10	0	0	0	1.9	4.55	5.33	1.9	4.55	5.33
12	0	0	0	0	2.01	2.98	0	2.01	2.98
14	0	0	0	0	0.9	1.78	0	0.9	1.78
	NOx: NO3- plus NO2-

## Sheet: Figure 2
Panel a: Growth OD600nm
Time (h)	9.6 mM (GP59)			42.8 mM (GP59)			9.6 mM (JAM1)			42.8 mM (JAM1)			NO3
0				0.034	0.027	0.027
24				0.038	0.042	0.029
43.5				0.442	0.25	0.246
49.5				0.95	0.5	0.53
68.5				1.161	1.098	1.122
73.5				1.2	1.086	1.248
95				1.098	1.101	1.167
140				1.059	1.017	1.11
0	0.043	0.043	0.04
23	0.041	0.026	0.024
48	0.23	0.236	0.268
54	0.323	0.319	0.328
70	0.372	0.35	0.358
76	0.396	0.36	0.384
98	0.399	0.354	0.369
0							0.017	0.009	0.014	-0.002	0.003	0.014
20							0.097	0.081	0.087	0.094	0.113	0.075
27							0.104	0.105	0.112	0.171	0.201	0.167
44							0.13	0.114	0.129	0.197	0.218	0.239
51										0.211	0.214	0.244
71							0.163	0.152	0.161	0.23	0.247	0.255
120							0.157	0.11	0.11	0.173	0.194	0.228
Panel b: mM or µmole vial-1 (N2O)
Time (h)	NO3- (GP59)		NO2- (GP59)		N2O (GP59)		NO3- (JAM1)		NO2- (JAM1)		N2O (JAM1)
0	23.5	24.5	0	0	0.0259	0.0265	24.7	24	0	0	0.00497	0.00193
5	23.5	24	0	0	0.1058	0.0876	21.9	21.9	3	2.6
11	22.9	23	0.4	0.3	0.1055	0.2094	14.8	14.8	10	9.1
17	21.2	21	0.7	1	0.3144	0.5377	5.9	6	18.3	18.4
23	17	14.8	2	2.2	0.3083	0.688	0.9	0.3	22.8	22.7	0.05719	0.01547
29	6.9	2.9	4.9	5.9	0.3517	0.4716	0.2	0	23.2	22.4
35	0.1	0	1.5	0.1	0.1688	0.1094	0	0	22.4	22.1
41	0	0.2	0	0.2	0.0138	0.0376
49	0.1	0	0.1	0	0.0221	0.0257	0	0	22.7	21.9	0.07543	0.04338
54					0	0.0218

## Sheet: Figure 3
Panel A
Nitrate mM	GP59 (mM h-1)			JAM1 (mM h-1)
	Rep1	Rep2	Rep3	Rep1	Rep2	Rep3
9.6	0.2816	0.2803	0.2604	0.432646	0.436076	0.454543
16.1	0.478	0.4479	0.3642	0.6325	0.6184	0.5672
24.2	0.5454	0.4689	0.4763	0.7949	0.7268	0.7094
32.3	0.6007	0.5834	0.8234	0.774	0.7803	0.9049
42.8	1.0276	1.5135	1.0118	0.7619	0.748	0.819
71.4	1.5127		1.6082	0.9632	0.7921	0.7355
107.1	2.3243	2.1349	1.7885	0.8603	0.8907	1.0348
142.8	2.4295	2.0177	3.2465	0.7971	0.8226	0.8248
Panel B
Nitrate mM	GP59 (mM h-1 OD-1)			JAM1 (mM h-1 OD-1)
	Rep1	Rep2	Rep3	Rep1	Rep2	Rep3
9.6	1.22	1.19	0.97	4.46	5.38	5.22
16.1	1.43	1.08	0.71	5.97	4.42	3.94
24.2	0.87	0.88	1.06	5.37	4.69	5.03
32.3	1.44	1.45	1.67	4.4	4.54	4.89
42.8	1.08	1.38	0.9	3.87	3.43	3.43
71.4	1.18		1.23	4.91	3.62	3.28
107.1	2.81	1.6	1.42	4.39	5.09	5.05
142.8	1.91	2.9	2.71	6.08	6.23	5.65
