# Supplementary material for: Strain-level genetic diversity of Methylophaga nitratireducenticrescens confers plasticity to denitrification capacity in a methylotrophic marine denitrifying biofilm
Source: PeerJ journal article supplement (doi:10.7717/peerj.4679), 2018-04-23
Supplement: Supplemental_Figure_S3.pdf [file Supplemental_Figure_S3.pdf]

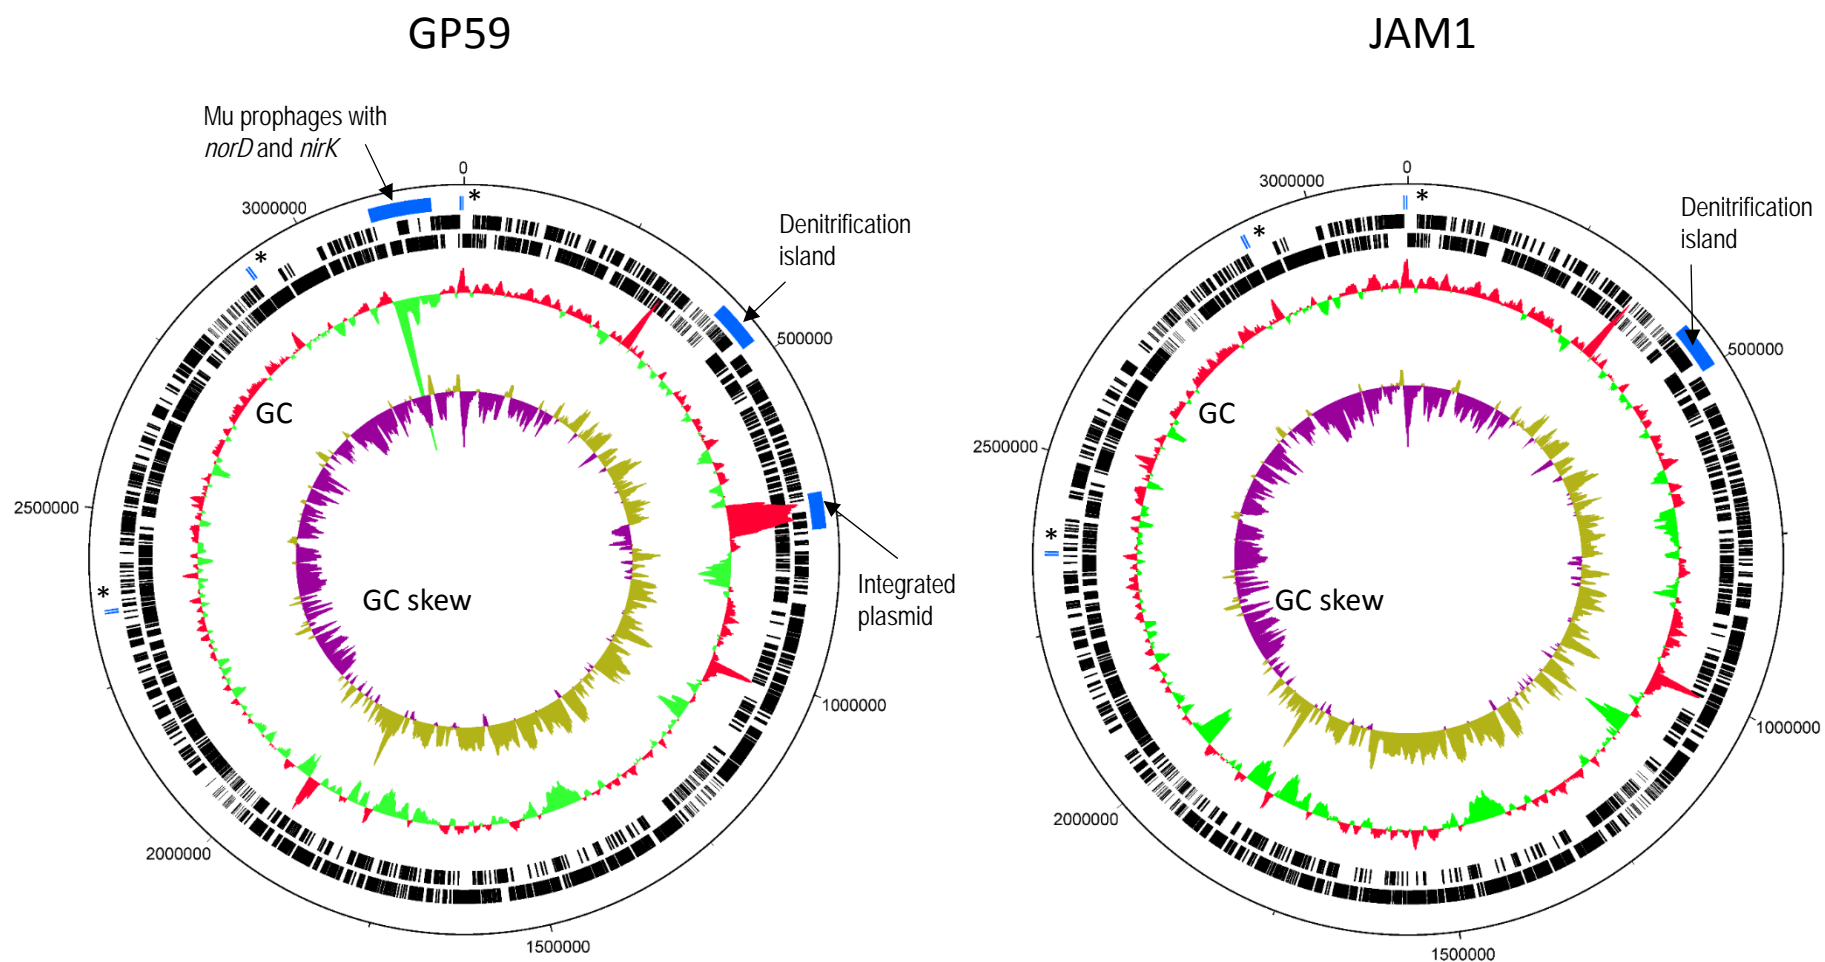

**Figure S3: Selected features of the genomes of *Methylophaga nitratireducens* GP59 (CP021973) and JAM1 (CP003390).**

First track (in blue): Specific traits. \*: rRNA gene clusters (5S-23S-16S).

Second and third tracks (in black). Coding sequences (plus and minus strands)

Fourth track (red and green): Guanine and Cytosine (GC) content

Fifth track (magenta and olive): GC skew
